# Supplementary material
Source: PubMed Central journal article supplement (PMC4400759)
Supplement: JCM.00323-15_zjm999094259so2.pdf [file JCM.00323-15_zjm999094259so2.pdf]

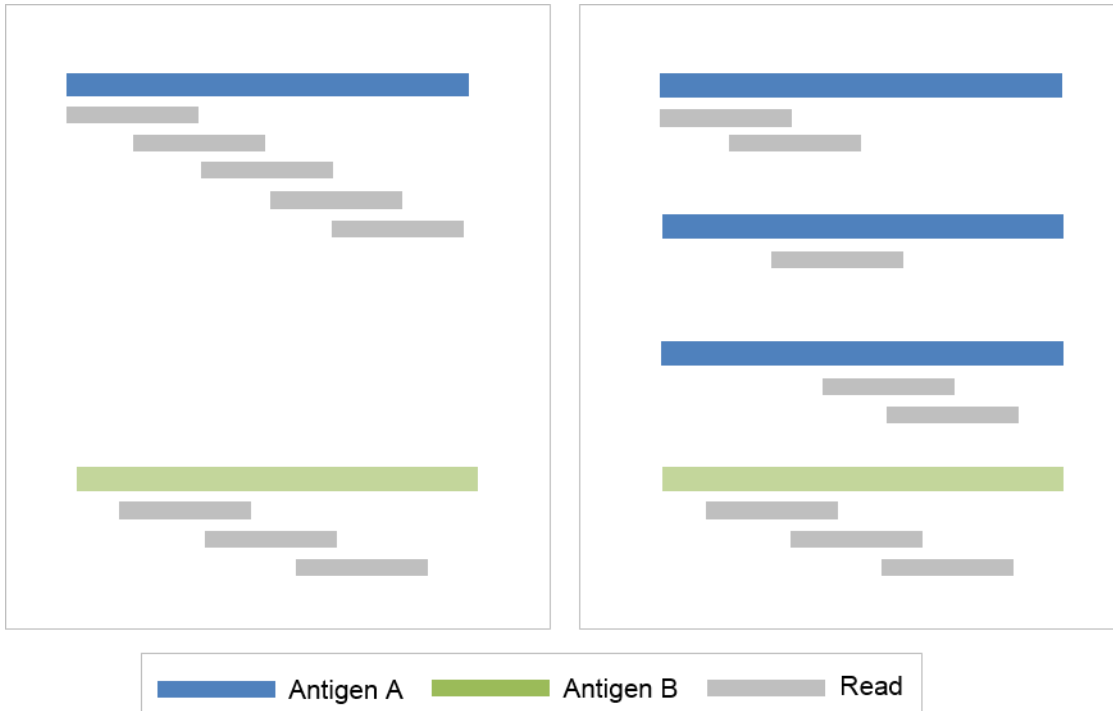

Figure S1. The reads dilution effect. When multiple alleles of Antigen A are archived in the database instead of only one, those alleles compete for reads, leading to the highest amount of reads mapped to an Antigen A allele decreases from 5 to 2, fewer than the 3 mapped to Antigen B.
